# Supplementary material for: Extraction in cholinium-based magnetic ionic liquid aqueous two-phase system for the determination of berberine hydrochloride in Rhizoma coptidis
Source: Royal Society of Chemistry journal article supplement (doi:10.1039/c8ra01745j), 2018-01-01
Supplement: c8ra01745j1.pdf [file c8ra01745j1.pdf]

**Extraction in cholinium-based magnetic ionic liquid aqueous two-phase system for the determination of berberine hydrochloride in *Rhizoma Coptidis***

Li-rong Nie, Hang Song, Alula Yohannes, Siwei Liang, Shun Yao\*

School of Chemical Engineering, Sichuan University, Chengdu 610065, P. R. China

\*Corresponding author, E-mail: [Cusack@scu.edu.cn](mailto:Cusack@scu.edu.cn)

**Table S1** Binodal curve data for the mass fraction (w) in the five MILs (1) + K<sub>3</sub>PO<sub>4</sub> (2) + H<sub>2</sub>O (3) systems at 298.15 K

| 100w <sub>2</sub>                                                                                              | 100w <sub>1</sub> | 100w <sub>2</sub> | 100w <sub>1</sub> | 100w <sub>2</sub> | 100w <sub>1</sub> |
|----------------------------------------------------------------------------------------------------------------|-------------------|-------------------|-------------------|-------------------|-------------------|
| [N <sub>11</sub> H <sub>20</sub> H] [TEMPO-OSO <sub>3</sub> ]+K <sub>3</sub> PO <sub>4</sub> +H <sub>2</sub> O |                   |                   |                   |                   |                   |
| 14.816                                                                                                         | 39.479            | 22.897            | 13.129            | 27.361            | 4.8330            |
| 15.078                                                                                                         | 36.604            | 23.182            | 12.424            | 27.711            | 4.3960            |
| 15.515                                                                                                         | 33.619            | 23.574            | 11.677            | 28.198            | 3.9500            |
| 15.821                                                                                                         | 30.957            | 23.889            | 10.995            | 28.357            | 3.6840            |
| 16.371                                                                                                         | 28.39             | 24.241            | 10.346            | 28.595            | 3.3830            |
| 17.243                                                                                                         | 25.773            | 24.575            | 9.7710            | 28.986            | 3.0710            |
| 17.969                                                                                                         | 23.659            | 24.780            | 9.3210            | 29.482            | 2.6670            |
| 18.757                                                                                                         | 21.759            | 25.046            | 8.7600            | 29.762            | 2.4420            |
| 19.554                                                                                                         | 20.131            | 25.377            | 8.2020            | 30.208            | 2.2200            |
| 20.033                                                                                                         | 18.928            | 25.696            | 7.6260            | 30.798            | 1.9250            |
| 20.592                                                                                                         | 17.651            | 25.921            | 7.1250            | 31.371            | 1.6530            |
| 21.375                                                                                                         | 16.352            | 26.254            | 6.6400            | 31.974            | 1.4240            |
| 21.899                                                                                                         | 15.386            | 26.447            | 6.2340            | 33.083            | 1.1330            |
| 22.236                                                                                                         | 14.593            | 26.722            | 5.8090            | 34.587            | 0.8600            |
| 22.506                                                                                                         | 3.8650            | 27.005            | 5.3670            |                   |                   |
| [N <sub>11220</sub> H] [TEMPO-OSO <sub>3</sub> ]+K <sub>3</sub> PO <sub>4</sub> +H <sub>2</sub> O              |                   |                   |                   |                   |                   |
| 10.929                                                                                                         | 59.602            | 21.502            | 11.035            | 26.227            | 4.6110            |
| 12.181                                                                                                         | 37.159            | 21.871            | 10.403            | 26.547            | 4.3620            |
| 12.481                                                                                                         | 33.869            | 22.411            | 9.6610            | 26.790            | 4.1940            |
| 13.205                                                                                                         | 30.766            | 22.863            | 8.8800            | 26.939            | 4.0320            |
| 14.139                                                                                                         | 27.304            | 23.096            | 8.4720            | 27.222            | 3.8360            |

|        |        |        |        |        |        |
|--------|--------|--------|--------|--------|--------|
| 14.935 | 24.913 | 23.543 | 7.8650 | 27.481 | 3.6260 |
| 15.915 | 22.501 | 23.984 | 7.4490 | 27.969 | 3.3100 |
| 16.503 | 21.311 | 24.068 | 7.2350 | 28.525 | 3.0420 |
| 17.151 | 19.971 | 24.268 | 6.9850 | 28.779 | 2.8170 |
| 17.965 | 18.450 | 24.411 | 6.6720 | 29.116 | 2.6190 |
| 18.396 | 17.303 | 24.632 | 6.3990 | 29.499 | 2.4400 |
| 19.141 | 15.983 | 24.851 | 6.1300 | 29.910 | 2.2530 |
| 19.428 | 15.101 | 25.037 | 5.8610 | 30.390 | 2.0220 |
| 19.844 | 14.089 | 25.409 | 5.5020 | 31.130 | 1.7980 |
| 20.292 | 13.32  | 25.710 | 5.1740 | 31.868 | 1.5770 |
| 20.481 | 12.881 | 25.911 | 4.9820 | 33.337 | 1.2310 |
| 20.933 | 12.025 | 26.129 | 4.7750 |        |        |

---

[N<sub>11320H</sub>] [TEMPO-OSO<sub>3</sub>]+K<sub>3</sub>PO<sub>4</sub>+H<sub>2</sub>O

|        |        |        |        |        |        |
|--------|--------|--------|--------|--------|--------|
| 8.5642 | 66.634 | 18.863 | 13.199 | 23.195 | 5.7421 |
| 10.175 | 36.274 | 19.189 | 12.480 | 23.484 | 5.3893 |
| 11.561 | 31.109 | 19.242 | 12.042 | 23.933 | 5.0603 |
| 11.911 | 28.723 | 19.371 | 11.623 | 24.184 | 4.7200 |
| 13.032 | 27.182 | 19.554 | 11.231 | 24.446 | 4.4409 |
| 13.454 | 25.635 | 19.736 | 10.874 | 24.812 | 4.1842 |
| 14.294 | 23.926 | 19.999 | 10.427 | 25.228 | 3.9150 |
| 14.559 | 22.720 | 20.186 | 10.002 | 25.601 | 3.6446 |
| 14.840 | 21.634 | 20.506 | 9.5700 | 25.808 | 3.4184 |
| 15.453 | 20.581 | 20.640 | 9.2138 | 26.087 | 3.1522 |
| 15.980 | 19.546 | 20.876 | 8.8538 | 26.596 | 2.8958 |
| 16.191 | 18.870 | 21.102 | 8.4935 | 27.025 | 2.6310 |
| 16.713 | 18.086 | 21.431 | 8.1469 | 27.500 | 2.4075 |
| 16.952 | 16.882 | 21.538 | 7.7897 | 28.255 | 2.1487 |
| 17.472 | 15.990 | 21.706 | 7.4473 | 29.668 | 1.6549 |
| 17.552 | 15.478 | 22.077 | 6.9802 | 35.168 | 0.8947 |
| 17.867 | 14.922 | 22.313 | 6.6376 | 35.894 | 0.5984 |
| 18.144 | 14.377 | 22.636 | 6.3187 |        |        |
| 18.467 | 13.854 | 22.857 | 6.0393 |        |        |

---

[N<sub>11420H</sub>] [TEMPO-OSO<sub>3</sub>]+K<sub>3</sub>PO<sub>4</sub>+H<sub>2</sub>O

|        |        |        |        |        |        |
|--------|--------|--------|--------|--------|--------|
| 4.9295 | 68.094 | 15.416 | 16.252 | 19.789 | 7.9110 |
|--------|--------|--------|--------|--------|--------|

|                                                                                                   |        |        |        |        |        |
|---------------------------------------------------------------------------------------------------|--------|--------|--------|--------|--------|
| 6.7129                                                                                            | 48.491 | 15.605 | 15.553 | 20.151 | 7.4700 |
| 7.7829                                                                                            | 40.443 | 15.918 | 14.881 | 20.341 | 7.0180 |
| 8.8517                                                                                            | 35.629 | 16.208 | 14.385 | 20.692 | 6.6410 |
| 9.8614                                                                                            | 30.957 | 16.609 | 13.575 | 20.997 | 6.2620 |
| 10.363                                                                                            | 29.243 | 17.070 | 12.877 | 21.246 | 5.9180 |
| 11.063                                                                                            | 27.372 | 17.346 | 12.308 | 21.512 | 5.5570 |
| 11.704                                                                                            | 25.611 | 17.502 | 11.741 | 21.917 | 5.2190 |
| 12.267                                                                                            | 24.118 | 17.770 | 11.276 | 22.272 | 4.9160 |
| 12.821                                                                                            | 22.639 | 18.044 | 10.842 | 22.625 | 4.6430 |
| 13.409                                                                                            | 21.319 | 18.372 | 10.385 | 22.906 | 4.3460 |
| 13.829                                                                                            | 20.203 | 18.584 | 9.8390 | 23.430 | 3.8900 |
| 14.226                                                                                            | 19.163 | 19.025 | 9.2810 | 24.176 | 3.4130 |
| 14.622                                                                                            | 18.162 | 19.272 | 8.8460 | 25.074 | 3.0130 |
| 15.004                                                                                            | 17.269 | 19.442 | 8.4610 | 27.925 | 1.6580 |
| [N <sub>11520H</sub> ] [TEMPO-OSO <sub>3</sub> ]+K <sub>3</sub> PO <sub>4</sub> +H <sub>2</sub> O |        |        |        |        |        |
| 1.0692                                                                                            | 76.377 | 13.427 | 17.891 | 17.726 | 8.0460 |
| 1.7720                                                                                            | 63.009 | 13.612 | 17.328 | 18.221 | 7.5530 |
| 3.1849                                                                                            | 52.682 | 13.943 | 16.695 | 18.357 | 7.0500 |
| 5.8886                                                                                            | 40.307 | 14.259 | 15.943 | 18.637 | 6.6780 |
| 7.0010                                                                                            | 36.971 | 14.356 | 15.392 | 19.049 | 6.2100 |
| 7.6231                                                                                            | 34.633 | 14.688 | 14.725 | 19.472 | 5.7320 |
| 8.1639                                                                                            | 32.698 | 14.933 | 14.172 | 19.677 | 5.3720 |
| 8.9991                                                                                            | 31.002 | 15.095 | 13.597 | 20.040 | 5.0470 |
| 9.3518                                                                                            | 29.307 | 15.286 | 13.031 | 20.299 | 4.7090 |
| 10.065                                                                                            | 27.686 | 15.486 | 12.438 | 20.663 | 4.3560 |
| 10.578                                                                                            | 26.022 | 15.842 | 11.784 | 21.090 | 4.0670 |
| 11.213                                                                                            | 24.662 | 15.898 | 11.324 | 21.349 | 3.7880 |
| 11.681                                                                                            | 23.238 | 16.162 | 10.865 | 21.732 | 3.5170 |
| 11.860                                                                                            | 22.263 | 16.547 | 10.276 | 22.187 | 3.2710 |
| 12.164                                                                                            | 21.161 | 16.843 | 9.7430 | 23.201 | 2.6570 |
| 12.599                                                                                            | 20.227 | 17.019 | 9.2840 | 23.724 | 2.2660 |
| 12.923                                                                                            | 19.320 | 17.249 | 8.8480 | 25.430 | 1.6170 |
| 13.166                                                                                            | 18.540 | 17.535 | 8.4790 |        |        |

**Table S2** Values of parameters of Eq. (1) for the MILs + salts + water at different temperature

| MILs+salts (T)                                                                                                            | <i>a</i> | <i>b</i> | <i>c</i> | 100SD <sup>a</sup> |
|---------------------------------------------------------------------------------------------------------------------------|----------|----------|----------|--------------------|
| [N <sub>111H2OH</sub> ] [TEMPO-OSO <sub>3</sub> ] + K <sub>3</sub> PO <sub>4</sub> (298.15k)                              | 3.14989  | -4.99127 | 71.6165  | 0.8789             |
| [N <sub>1122OH</sub> ] [TEMPO-OSO <sub>3</sub> ] + K <sub>3</sub> PO <sub>4</sub> (298.15k)                               | 22.7191  | -11.4177 | 13.4885  | 1.8696             |
| [N <sub>1132OH</sub> ] [TEMPO-OSO <sub>3</sub> ] + K <sub>3</sub> PO <sub>4</sub> (298.15k)                               | 13.0105  | -10.5055 | 21.6850  | 1.9313             |
| [N <sub>1142OH</sub> ] [TEMPO-OSO <sub>3</sub> ] + K <sub>3</sub> PO <sub>4</sub> (298.15k)                               | 3.24427  | -7.15220 | 64.0562  | 0.8019             |
| [N <sub>1152OH</sub> ] [TEMPO-OSO <sub>3</sub> ] + K <sub>3</sub> PO <sub>4</sub> (298.15k)                               | 1.10129  | -3.90652 | 164.739  | 0.7061             |
| [N <sub>1152OH</sub> ] [TEMPO-OSO <sub>3</sub> ] + K <sub>2</sub> HPO <sub>4</sub> (298.15k)                              | 1.09084  | -3.38581 | 130.960  | 0.3526             |
| [N <sub>1152OH</sub> ] [TEMPO-OSO <sub>3</sub> ] + K <sub>2</sub> CO <sub>3</sub> (298.15k)                               | 1.41234  | -3.70054 | 141.232  | 0.5397             |
| [N <sub>1152OH</sub> ] [TEMPO-OSO <sub>3</sub> ] + K <sub>3</sub> C <sub>6</sub> H <sub>5</sub> O <sub>7</sub> (298.15k)  | 1.14377  | -2.61512 | 58.4064  | 0.6944             |
| [N <sub>1152OH</sub> ] [TEMPO-OSO <sub>3</sub> ] + Na <sub>3</sub> C <sub>6</sub> H <sub>5</sub> O <sub>7</sub> (298.15k) | 1.12097  | -3.32560 | 88.8466  | 0.3906             |
| [N <sub>1152OH</sub> ] [TEMPO-OSO <sub>3</sub> ] + K <sub>3</sub> PO <sub>4</sub> (308.15)                                | 1.08030  | -4.04766 | 161.813  | 0.9053             |
| [N <sub>1152OH</sub> ] [TEMPO-OSO <sub>3</sub> ] + K <sub>3</sub> PO <sub>4</sub> (318.15)                                | 0.95882  | -3.64297 | 176.941  | 0.7061             |

<sup>a</sup>SD =  $\{\sum_{i=1}^n (w_1^{\text{cal}} - w_1^{\text{exp}})^2 / n\}^{0.5}$ , where  $w_1^{\text{exp}}$  is the experimental mass fraction of MIL,  $w_1^{\text{cal}}$  is the corresponding data calculated using Eq. (1).  $n$  is the number of bimodal data points.

**Table S3** Tie-line data of MILs (1) + salts (2) + water (3) systems at different temperature

| MILs+salts<br>(T)                                                                   | total system      |                   | MIL-rich phase                  |                                 | salt-rich phase                |                                | <i>TLL</i> | <i>S</i> |
|-------------------------------------------------------------------------------------|-------------------|-------------------|---------------------------------|---------------------------------|--------------------------------|--------------------------------|------------|----------|
|                                                                                     | 100w <sub>2</sub> | 100w <sub>1</sub> | 100 w <sub>2</sub> <sup>t</sup> | 100 w <sub>1</sub> <sup>t</sup> | 100w <sub>2</sub> <sup>b</sup> | 100w <sub>1</sub> <sup>b</sup> |            |          |
| MIL 1+K <sub>3</sub> PO <sub>4</sub><br>(298.15K)                                   | 20.00             | 30.00             | 12.109                          | 48.838                          | 31.770                         | 1.9017                         | 50.887     | -2.3873  |
|                                                                                     | 18.26             | 32.63             | 12.443                          | 47.176                          | 29.302                         | 3.487                          | 46.829     | -2.5915  |
|                                                                                     | 16.86             | 35.73             | 12.345                          | 47.660                          | 29.912                         | 3.022                          | 47.970     | -2.5410  |
| MIL 2+K <sub>3</sub> PO <sub>4</sub><br>(298.15K)                                   | 20.00             | 30.00             | 10.075                          | 62.771                          | 28.805                         | 3.5899                         | 59.221     | -2.9995  |
|                                                                                     | 18.91             | 33.90             | 9.6233                          | 62.002                          | 27.798                         | 4.1321                         | 63.526     | -3.349   |
|                                                                                     | 15.73             | 35.57             | 10.385                          | 56.478                          | 22.658                         | 8.4708                         | 49.551     | -3.912   |
| MIL 3+K <sub>3</sub> PO <sub>4</sub><br>(298.15K)                                   | 20.00             | 30.00             | 7.8780                          | 67.474                          | 28.814                         | 2.7538                         | 68.022     | -3.0913  |
|                                                                                     | 17.86             | 30.98             | 8.1740                          | 63.787                          | 25.717                         | 4.3693                         | 61.953     | -3.3870  |
|                                                                                     | 17.19             | 34.76             | 8.1504                          | 64.071                          | 26.754                         | 3.7503                         | 63.124     | -3.2425  |
| MIL 4+K <sub>3</sub> PO <sub>4</sub><br>(298.15K)                                   | 20.00             | 30.00             | 4.4210                          | 71.714                          | 30.857                         | 0.9297                         | 75.560     | -2.6776  |
|                                                                                     | 19.00             | 33.67             | 4.3279                          | 72.891                          | 31.283                         | 0.8359                         | 76.932     | -2.6731  |
|                                                                                     | 15.92             | 35.60             | 4.9167                          | 65.927                          | 28.211                         | 1.7248                         | 68.297     | -2.7561  |
| MIL 5+K <sub>3</sub> PO <sub>4</sub><br>(298.15K)                                   | 20.00             | 30.00             | 0.3786                          | 76.255                          | 32.764                         | 0.0227                         | 78.672     | -2.2214  |
|                                                                                     | 18.93             | 32.09             | 1.0995                          | 75.099                          | 32.368                         | 0.0338                         | 79.673     | -2.2999  |
|                                                                                     | 16.70             | 35.50             | 1.1017                          | 73.069                          | 31.408                         | 0.0749                         | 79.036     | -2.4085  |
| MIL 5+K <sub>2</sub> HPO <sub>4</sub><br>(298.15K)                                  | 20.00             | 30.00             | 1.4614                          | 72.414                          | 33.052                         | 0.1376                         | 78.879     | -2.2879  |
|                                                                                     | 18.27             | 33.32             | 1.5616                          | 71.415                          | 32.817                         | 0.1532                         | 78.457     | -2.3160  |
|                                                                                     | 16.42             | 35.29             | 1.9428                          | 67.981                          | 31.949                         | 0.2249                         | 74.103     | -2.2581  |
| MIL5+K <sub>2</sub> CO <sub>3</sub><br>(298.15K)                                    | 20.00             | 30.00             | 2.7423                          | 76.302                          | 31.086                         | 0.2579                         | 81.154     | -2.6830  |
|                                                                                     | 17.98             | 33.78             | 2.8440                          | 75.422                          | 30.116                         | 0.3914                         | 79.834     | -2.7512  |
|                                                                                     | 15.56             | 35.27             | 3.6166                          | 69.407                          | 27.527                         | 1.0650                         | 72.404     | -2.8582  |
| MIL 5+<br>K <sub>3</sub> C <sub>6</sub> H <sub>5</sub> O <sub>7</sub><br>(298.15K)  | 20.00             | 30.00             | 4.4673                          | 65.468                          | 31.144                         | 4.5525                         | 66.501     | -2.2834  |
|                                                                                     | 17.67             | 32.67             | 5.3675                          | 61.843                          | 28.202                         | 7.6958                         | 58.765     | -2.3713  |
|                                                                                     | 15.90             | 36.92             | 5.1799                          | 62.565                          | 28.019                         | 7.9282                         | 59.218     | -2.4165  |
| MIL 5+<br>Na <sub>3</sub> C <sub>6</sub> H <sub>5</sub> O <sub>7</sub><br>(298.15K) | 20.00             | 30.00             | 1.6799                          | 72.814                          | 32.495                         | 0.7985                         | 78.332     | -2.3370  |
|                                                                                     | 18.19             | 33.05             | 1.9407                          | 70.487                          | 32.150                         | 0.8881                         | 75.872     | -2.3039  |
|                                                                                     | 15.91             | 36.04             | 2.5969                          | 65.490                          | 31.749                         | 1.0020                         | 70.771     | -2.2121  |
| MIL 5+K <sub>3</sub> PO <sub>4</sub><br>(308.15K)                                   | 20.00             | 30.00             | 0.8366                          | 74.595                          | 32.877                         | 0.0338                         | 81.154     | -2.3271  |
|                                                                                     | 18.98             | 31.14             | 1.0188                          | 73.786                          | 32.724                         | 0.0367                         | 78.442     | -2.2630  |
|                                                                                     | 16.67             | 35.61             | 0.9386                          | 69.976                          | 31.634                         | 0.0661                         | 79.108     | -2.3752  |
| MIL 5+K <sub>3</sub> PO <sub>4</sub>                                                | 20.00             | 30.00             | 0.3953                          | 76.252                          | 32.706                         | 0.0245                         | 82.793     | -2.3593  |

|           |       |       |        |        |        |        |        |         |
|-----------|-------|-------|--------|--------|--------|--------|--------|---------|
| (318.15K) | 18.43 | 32.21 | 0.3510 | 75.068 | 31.332 | 0.0540 | 83.198 | -2.4923 |
|           | 16.54 | 34.16 | 0.5125 | 73.869 | 30.290 | 0.0945 | 79.557 | -2.4775 |

Note: MIL 1= [N<sub>11H2OH</sub>] [TEMPO-OSO<sub>3</sub>]; MIL 2= [N<sub>1122OH</sub>] [TEMPO-OSO<sub>3</sub>]; MIL 3= [N<sub>1132OH</sub>] [TEMPO-OSO<sub>3</sub>]; MIL 4= [N<sub>1142OH</sub>] [TEMPO-OSO<sub>3</sub>]; MIL 5= [N<sub>1152OH</sub>] [TEMPO-OSO<sub>3</sub>].

**Table S4** Values of parameters of Eq. (10) and Eq. (11) for the five MILs (1) + salts (2) + water (3) systems at different temperature

| MILs+salts (T) | $k_1$ | $n$ | $k_2$ | $r$ | $R_1^2$ | $R_2^2$ |
|----------------|-------|-----|-------|-----|---------|---------|
|----------------|-------|-----|-------|-----|---------|---------|

|                                                                               |        |        |        |        |        |        |
|-------------------------------------------------------------------------------|--------|--------|--------|--------|--------|--------|
| MIL 1+ K <sub>3</sub> PO <sub>4</sub> (298.15K)                               | 0.6798 | 0.5651 | 2.8576 | 1.4002 | 0.9981 | 0.9972 |
| MIL 2+ K <sub>3</sub> PO <sub>4</sub> (298.15K)                               | 0.2813 | 0.8202 | 4.7885 | 0.8540 | 0.9992 | 0.9996 |
| MIL 3+ K <sub>3</sub> PO <sub>4</sub> (298.15K)                               | 0.1794 | 1.1034 | 4.5290 | 0.6424 | 0.9255 | 0.9285 |
| MIL 4+ K <sub>3</sub> PO <sub>4</sub> (298.15K)                               | 0.0665 | 2.1969 | 3.4261 | 0.3952 | 0.9981 | 0.9981 |
| MIL 5+ K <sub>3</sub> PO <sub>4</sub> (298.15K)                               | 0.0013 | 7.2925 | 2.5003 | 0.1366 | 0.9989 | 0.9955 |
| MIL 5+ K <sub>2</sub> HPO <sub>4</sub> (298.15K)                              | 0.0199 | 4.1886 | 2.5858 | 0.2400 | 0.9995 | 0.9995 |
| MIL 5+ K <sub>2</sub> CO <sub>3</sub> (298.15K)                               | 0.0566 | 2.1122 | 3.9300 | 0.4378 | 0.9826 | 0.9810 |
| MIL 5+ K <sub>3</sub> C <sub>6</sub> H <sub>5</sub> O <sub>7</sub> (298.15K)  | 0.2468 | 0.9588 | 3.6551 | 0.7302 | 0.9436 | 0.9457 |
| MIL 5+ Na <sub>3</sub> C <sub>6</sub> H <sub>5</sub> O <sub>7</sub> (298.15K) | 0.0002 | 10.137 | 2.2652 | 0.0923 | 0.9789 | 0.9788 |
| MIL 5+ K <sub>3</sub> PO <sub>4</sub> (308.15K)                               | 0.0466 | 2.6500 | 3.3869 | 0.4226 | 0.9915 | 0.9966 |
| MIL 5+ K <sub>3</sub> PO <sub>4</sub> (318.15K)                               | 0.0204 | 3.9560 | 2.6779 | 0.2456 | 0.9963 | 0.9989 |

Note: MIL 1= [N<sub>11H2OH</sub>] [TEMPO-OSO<sub>3</sub>]; MIL 2= [N<sub>1122OH</sub>] [TEMPO-OSO<sub>3</sub>]; MIL 3= [N<sub>1132OH</sub>] [TEMPO-OSO<sub>3</sub>]; MIL 4= [N<sub>1142OH</sub>] [TEMPO-OSO<sub>3</sub>]; MIL 5= [N<sub>1152OH</sub>] [TEMPO-OSO<sub>3</sub>].

**Table S5** Binodal curve data for the mass fraction (w) in MILs (1) + salts (2) + H<sub>2</sub>O (3) systems at 298.15 K

| 100w <sub>2</sub>                                                                                  | 100w <sub>1</sub> | 100w <sub>2</sub> | 100w <sub>1</sub> | 100w <sub>2</sub> | 100w <sub>1</sub> |
|----------------------------------------------------------------------------------------------------|-------------------|-------------------|-------------------|-------------------|-------------------|
| [N <sub>1152OH</sub> ] [TEMPO-OSO <sub>3</sub> ]+K <sub>2</sub> HPO <sub>4</sub> +H <sub>2</sub> O |                   |                   |                   |                   |                   |
| 5.6593                                                                                             | 47.856            | 16.314            | 15.807            | 20.005            | 8.2465            |
| 7.3401                                                                                             | 40.950            | 16.472            | 15.153            | 20.160            | 7.8909            |

|        |        |        |        |        |        |
|--------|--------|--------|--------|--------|--------|
| 9.0890 | 34.847 | 16.724 | 14.546 | 20.486 | 7.5416 |
| 10.070 | 32.585 | 16.955 | 14.003 | 20.638 | 7.2446 |
| 11.135 | 30.081 | 17.154 | 13.507 | 20.929 | 6.9199 |
| 11.891 | 27.504 | 17.309 | 12.975 | 21.232 | 6.5571 |
| 12.759 | 25.711 | 17.656 | 12.433 | 21.520 | 6.2366 |
| 13.268 | 23.745 | 18.034 | 11.942 | 21.726 | 5.9799 |
| 13.867 | 22.193 | 18.258 | 11.446 | 22.058 | 5.6761 |
| 14.237 | 20.755 | 18.521 | 10.971 | 22.389 | 5.3955 |
| 14.566 | 19.660 | 18.857 | 10.476 | 22.802 | 5.0815 |
| 15.067 | 18.756 | 19.008 | 10.031 | 23.302 | 4.4175 |
| 15.422 | 17.981 | 19.120 | 9.6301 | 24.440 | 3.8157 |
| 15.738 | 17.227 | 19.417 | 9.0331 | 24.836 | 3.3914 |
| 16.040 | 16.525 | 19.855 | 8.6119 |        |        |

[N<sub>11520H</sub>] [TEMPO-OSO<sub>3</sub>]+K<sub>2</sub>CO<sub>3</sub>+H<sub>2</sub>O

|        |        |        |        |        |        |
|--------|--------|--------|--------|--------|--------|
| 6.8950 | 51.075 | 16.374 | 16.921 | 20.224 | 8.0819 |
| 7.9507 | 46.341 | 16.643 | 16.285 | 20.493 | 7.6304 |
| 8.6324 | 42.550 | 16.725 | 15.692 | 20.854 | 7.2150 |
| 9.6142 | 38.837 | 16.968 | 15.161 | 21.108 | 6.8304 |
| 11.020 | 35.177 | 17.015 | 14.749 | 21.460 | 6.3817 |
| 11.535 | 32.748 | 17.403 | 14.021 | 21.956 | 5.9258 |
| 12.429 | 30.598 | 17.537 | 13.422 | 22.153 | 5.5233 |
| 12.735 | 28.698 | 17.644 | 12.921 | 22.544 | 5.1698 |
| 13.098 | 26.980 | 18.020 | 12.350 | 22.915 | 4.8545 |
| 13.656 | 25.479 | 18.203 | 11.884 | 23.303 | 4.5064 |
| 14.057 | 24.178 | 18.332 | 11.488 | 23.551 | 4.2571 |
| 14.637 | 22.460 | 18.562 | 11.049 | 24.051 | 3.9711 |
| 15.004 | 21.213 | 18.814 | 10.620 | 24.310 | 3.7489 |
| 15.195 | 20.233 | 19.054 | 10.156 | 24.925 | 3.5022 |
| 15.702 | 19.039 | 19.363 | 9.6207 | 25.759 | 2.9371 |
| 15.930 | 18.280 | 19.680 | 9.0806 | 26.184 | 2.5977 |
| 16.085 | 17.603 | 19.988 | 8.5444 | 27.044 | 2.2350 |

[N<sub>11520H</sub>] [TEMPO-OSO<sub>3</sub>]+ K<sub>3</sub>C<sub>6</sub>H<sub>5</sub>O<sub>7</sub>+H<sub>2</sub>O

|        |        |        |        |        |        |
|--------|--------|--------|--------|--------|--------|
| 2.7841 | 73.938 | 20.878 | 20.363 | 27.037 | 9.0599 |
| 4.9500 | 63.390 | 21.259 | 19.176 | 27.639 | 8.2374 |
| 7.2287 | 55.661 | 21.776 | 18.086 | 28.299 | 7.6204 |
| 8.1665 | 51.496 | 22.180 | 17.108 | 29.005 | 6.9474 |
| 10.419 | 46.082 | 22.646 | 16.194 | 29.797 | 6.2815 |
| 11.640 | 42.248 | 23.032 | 15.382 | 30.527 | 5.7607 |
| 13.708 | 37.924 | 23.497 | 14.644 | 31.889 | 5.0167 |
| 15.181 | 34.605 | 23.847 | 13.817 | 32.786 | 4.4857 |
| 16.237 | 31.735 | 24.135 | 13.169 | 33.662 | 3.9693 |
| 17.585 | 28.611 | 24.596 | 12.480 | 34.953 | 3.4423 |
| 18.475 | 26.437 | 25.022 | 11.832 | 38.203 | 2.4174 |
| 19.056 | 24.679 | 25.460 | 11.137 | 42.224 | 1.5380 |



|                                                                                                                                  |        |        |        |        |        |
|----------------------------------------------------------------------------------------------------------------------------------|--------|--------|--------|--------|--------|
| 19.839                                                                                                                           | 23.030 | 25.837 | 10.550 |        |        |
| 20.276                                                                                                                           | 21.689 | 26.279 | 9.8836 |        |        |
| [N <sub>11520H</sub> ] [TEMPO-OSO <sub>3</sub> ]+ Na <sub>3</sub> C <sub>6</sub> H <sub>5</sub> O <sub>7</sub> +H <sub>2</sub> O |        |        |        |        |        |
| 1.0631                                                                                                                           | 79.789 | 15.108 | 23.061 | 20.669 | 11.005 |
| 3.5969                                                                                                                           | 59.387 | 15.691 | 21.611 | 21.360 | 9.7888 |
| 5.3176                                                                                                                           | 50.772 | 16.164 | 20.354 | 22.103 | 8.7865 |
| 7.3480                                                                                                                           | 43.498 | 16.499 | 19.378 | 22.745 | 7.9068 |
| 8.8480                                                                                                                           | 38.829 | 16.987 | 18.227 | 23.541 | 7.0670 |
| 10.772                                                                                                                           | 34.010 | 17.452 | 17.103 | 24.440 | 6.1804 |
| 12.158                                                                                                                           | 30.692 | 18.110 | 15.715 | 25.672 | 5.1369 |
| 12.909                                                                                                                           | 28.555 | 18.695 | 14.540 | 27.525 | 3.9767 |
| 13.640                                                                                                                           | 26.545 | 19.326 | 13.275 |        |        |
| 14.354                                                                                                                           | 24.736 | 19.934 | 12.167 |        |        |

**Table S6** Binodal curve data for the mass fraction (w) in [N<sub>11520H</sub>] [TEMPO-OSO<sub>3</sub>] (1) + K<sub>3</sub>PO<sub>4</sub> (2) + H<sub>2</sub>O (3) systems at different temperature

| 100w <sub>2</sub>                                                                                             | 100w <sub>1</sub> | 100w <sub>2</sub> | 100w <sub>1</sub> | 100w <sub>2</sub> | 100w <sub>1</sub> |
|---------------------------------------------------------------------------------------------------------------|-------------------|-------------------|-------------------|-------------------|-------------------|
| [N <sub>11520H</sub> ] [TEMPO-OSO <sub>3</sub> ]+K <sub>3</sub> PO <sub>4</sub> +H <sub>2</sub> O at 298.15 K |                   |                   |                   |                   |                   |
| 1.0692                                                                                                        | 73.517            | 13.427            | 17.661            | 17.726            | 8.4942            |
| 1.7720                                                                                                        | 65.413            | 13.612            | 17.200            | 18.221            | 7.6723            |
| 3.1849                                                                                                        | 54.553            | 13.943            | 16.384            | 18.357            | 7.4550            |
| 5.8886                                                                                                        | 41.266            | 14.259            | 15.626            | 18.637            | 7.0204            |
| 7.0010                                                                                                        | 37.021            | 14.356            | 15.397            | 19.049            | 6.4109            |

|        |        |        |        |        |        |
|--------|--------|--------|--------|--------|--------|
| 7.6231 | 34.816 | 14.688 | 14.621 | 19.472 | 5.8218 |
| 8.1639 | 32.977 | 14.933 | 14.061 | 19.677 | 5.5497 |
| 8.9991 | 30.256 | 15.095 | 13.697 | 20.040 | 5.0885 |
| 9.3518 | 29.145 | 15.286 | 13.275 | 20.299 | 4.7765 |
| 10.065 | 26.958 | 15.486 | 12.840 | 20.663 | 4.3603 |
| 10.578 | 25.435 | 15.842 | 12.084 | 21.090 | 3.9053 |
| 11.213 | 23.601 | 15.898 | 11.966 | 21.349 | 3.6464 |
| 11.681 | 22.286 | 16.162 | 11.424 | 21.732 | 3.2862 |
| 11.860 | 21.792 | 16.547 | 10.657 | 22.187 | 2.8931 |
| 12.164 | 20.962 | 16.843 | 10.087 | 23.201 | 2.1436 |
| 12.599 | 19.798 | 17.019 | 9.7562 | 23.724 | 1.8209 |
| 12.923 | 18.951 | 17.249 | 9.3354 | 25.430 | 1.0226 |
| 13.166 | 18.324 | 17.535 | 8.8251 | 17.726 | 8.4942 |

[N<sub>11520H</sub>] [TEMPO-OSO<sub>3</sub>]+K<sub>3</sub>PO<sub>4</sub>+H<sub>2</sub>O at 308.15 K

|        |        |        |        |        |        |
|--------|--------|--------|--------|--------|--------|
| 1.0500 | 71.758 | 12.126 | 19.928 | 16.185 | 10.563 |
| 2.9630 | 53.439 | 12.245 | 19.620 | 16.381 | 10.183 |
| 3.7978 | 48.379 | 12.413 | 19.187 | 16.697 | 9.5856 |
| 4.4848 | 44.835 | 12.642 | 18.603 | 16.898 | 9.2148 |
| 5.3348 | 40.986 | 12.815 | 18.166 | 17.092 | 8.8666 |
| 6.6831 | 35.829 | 13.071 | 17.525 | 17.180 | 8.7099 |
| 7.3357 | 33.701 | 13.334 | 16.879 | 17.413 | 8.3053 |
| 7.8013 | 32.233 | 13.582 | 16.276 | 17.501 | 8.1559 |
| 8.2531 | 30.842 | 13.806 | 15.742 | 17.649 | 7.9063 |
| 8.4433 | 30.265 | 13.917 | 15.480 | 17.816 | 7.6307 |
| 8.7370 | 29.384 | 14.123 | 14.996 | 18.190 | 7.2527 |
| 8.9084 | 28.875 | 14.248 | 14.708 | 18.446 | 6.8808 |
| 9.3758 | 27.504 | 14.451 | 14.241 | 18.762 | 6.4388 |
| 9.8786 | 26.058 | 14.661 | 13.768 | 19.012 | 6.1009 |
| 10.168 | 25.239 | 14.769 | 13.528 | 19.371 | 5.6372 |
| 10.446 | 24.459 | 14.889 | 13.264 | 19.652 | 5.2917 |
| 10.760 | 23.587 | 15.122 | 12.755 | 20.118 | 4.7499 |
| 11.197 | 22.395 | 15.348 | 12.273 | 20.577 | 4.2535 |
| 11.439 | 21.741 | 15.531 | 11.886 | 21.099 | 3.7352 |
| 11.665 | 21.141 | 15.886 | 11.158 | 21.724 | 3.1755 |
| 11.882 | 20.566 | 16.014 | 10.903 | 22.688 | 2.4360 |

[N<sub>11520H</sub>] [TEMPO-OSO<sub>3</sub>]+K<sub>3</sub>PO<sub>4</sub>+H<sub>2</sub>O at 318.15 K

|        |        |        |        |        |        |
|--------|--------|--------|--------|--------|--------|
| 0.5065 | 73.682 | 12.433 | 18.711 | 16.784 | 9.5164 |
| 1.9086 | 57.971 | 12.662 | 18.153 | 17.006 | 9.1350 |
| 4.2493 | 44.936 | 12.950 | 17.459 | 17.278 | 8.6786 |
| 5.1274 | 41.367 | 13.223 | 16.815 | 17.574 | 8.1987 |
| 5.9705 | 38.270 | 13.505 | 16.160 | 17.811 | 7.8260 |
| 6.0589 | 38.048 | 13.587 | 15.972 | 19.038 | 5.7978 |
| 7.0574 | 34.372 | 13.836 | 15.409 | 19.218 | 5.5548 |
| 7.5249 | 32.768 | 14.151 | 14.708 | 19.498 | 5.1895 |

|        |        |        |        |        |        |
|--------|--------|--------|--------|--------|--------|
| 8.2631 | 30.357 | 14.437 | 14.088 | 19.583 | 5.0822 |
| 8.9480 | 28.234 | 14.707 | 13.515 | 19.952 | 4.6325 |
| 9.6371 | 26.192 | 14.963 | 12.980 | 20.249 | 4.2914 |
| 10.159 | 24.701 | 15.193 | 12.512 | 20.858 | 3.6463 |
| 10.751 | 23.067 | 15.325 | 12.246 | 21.599 | 2.9583 |
| 10.931 | 22.581 | 15.482 | 11.933 | 21.920 | 2.6927 |
| 11.364 | 21.429 | 15.647 | 11.612 | 22.542 | 2.2279 |
| 11.817 | 20.258 | 16.100 | 10.748 | 22.875 | 2.0050 |
| 12.019 | 19.745 | 16.374 | 10.245 |        |        |
| 12.344 | 18.932 | 16.548 | 9.9315 |        |        |

---
